# Supplementary material for: Malachite green adsorption onto Fe3O4@SiO2-NH2: isotherms, kinetic and process optimization
Source: Royal Society of Chemistry journal article supplement (doi:10.1039/c4ra13402h), 2015-01-01
Supplement: c4ra13402h1.pdf [file c4ra13402h1.pdf]

## Supplementary Information

### Malachite green Adsorption onto $\text{Fe}_3\text{O}_4@\text{SiO}_2\text{-NH}_2$ : Isotherms, Kinetic and Process Optimization

Ling Sun, Shuchao Hu, Hongmei Sun, Huiling Guo, Hongda Zhu, Mingxing Liu and  
Honghao Sun\*

School of Food and pharmaceutical Engineering, Key Laboratory of Fermentation Engineering (Ministry of Education), Hubei

Provincial Cooperative Innovation Center of Industrial Fermentation, Hubei University of Technology, Wuhan, 430068, China.

\*Address correspondence to [sunhonghao@mail.hbut.edu.cn](mailto:sunhonghao@mail.hbut.edu.cn).

1

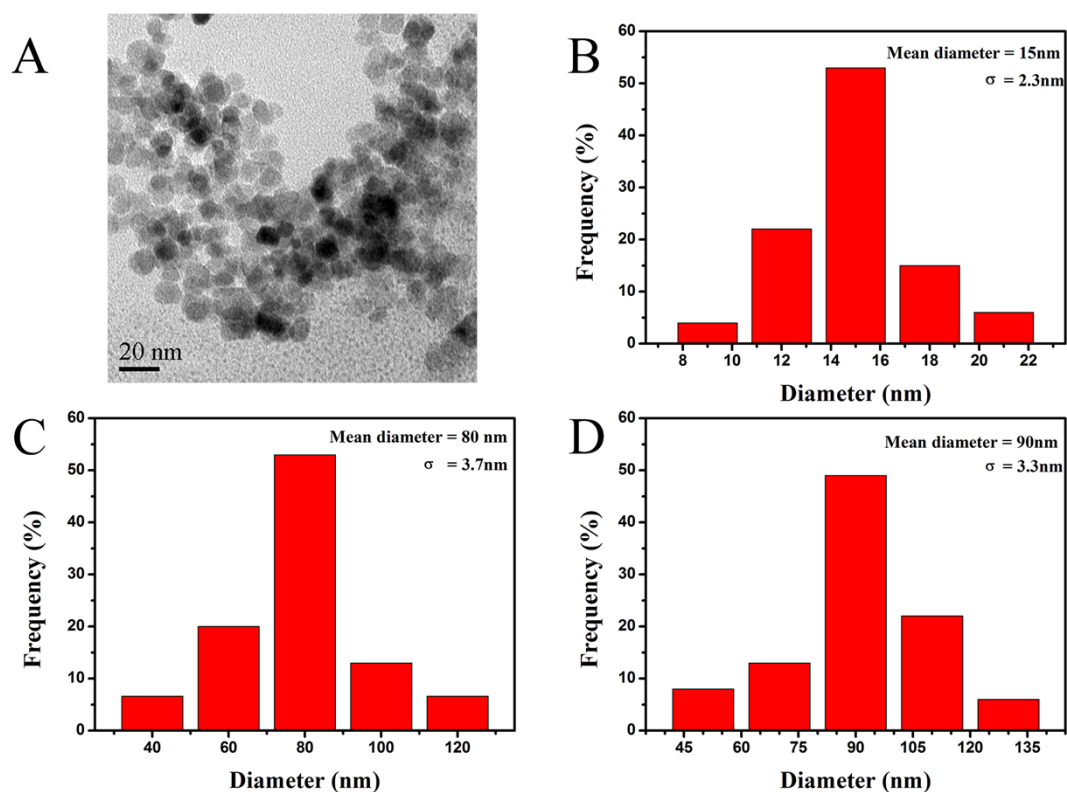

**Figure S1.** TEM image of  $\text{Fe}_3\text{O}_4$  (A), size distribution histogram of  $\text{Fe}_3\text{O}_4$  (B),  $\text{Fe}_3\text{O}_4@\text{SiO}_2$  (C), and  $\text{Fe}_3\text{O}_4@\text{SiO}_2\text{-NH}_2$  (D).

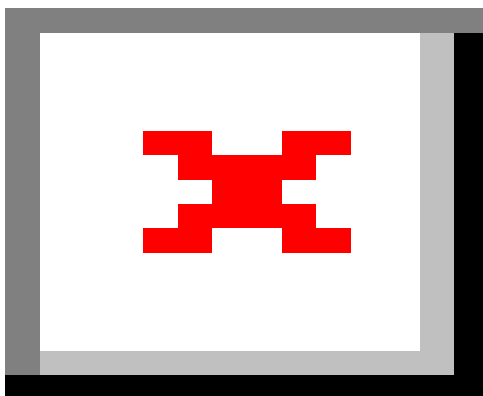

**Figure S2.** The number distribution histogram of  $\text{Fe}_3\text{O}_4$  nanoparticles at the core of the composite particles.

3

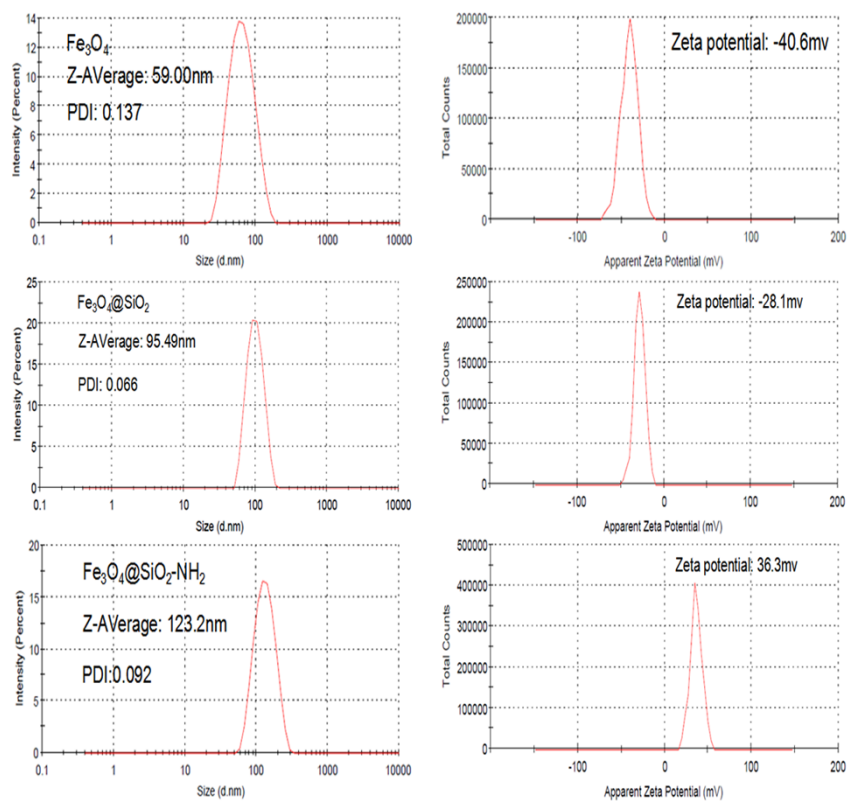

**Figure S3.** Dynamic light scattering measurements of Fe<sub>3</sub>O<sub>4</sub>, Fe<sub>3</sub>O<sub>4</sub>@SiO<sub>2</sub>, Fe<sub>3</sub>O<sub>4</sub>@SiO<sub>2</sub>-NH<sub>2</sub>.

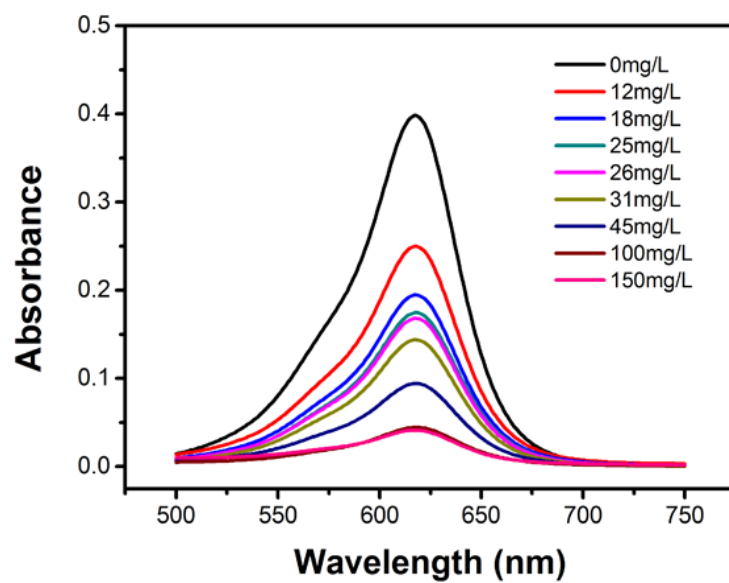

(a)

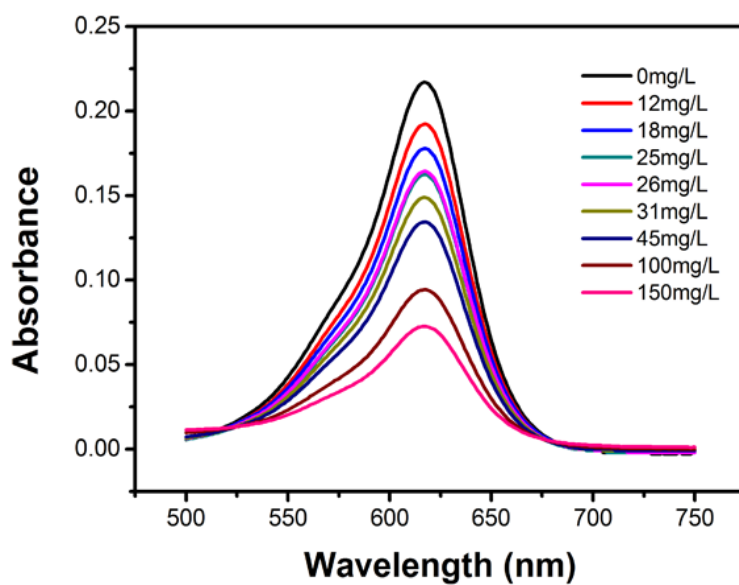

(b)

**Figure S4.** The UV-vis absorption of the malachite green (10mg/L) using the  $\text{Fe}_3\text{O}_4@\text{SiO}_2\text{-NH}_2$  (a) and  $\text{Fe}_3\text{O}_4@\text{SiO}_2$  (b).

5

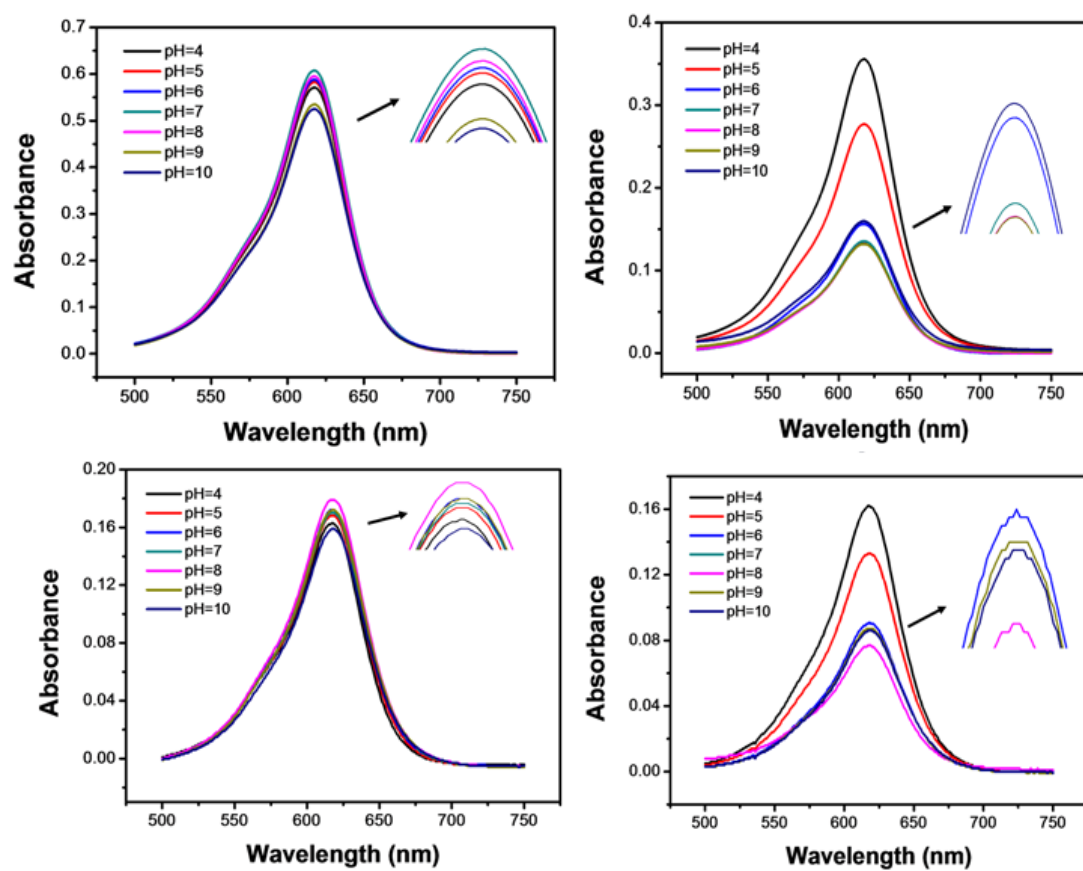

**Figure S5.** The UV-vis absorption of the malachite green before (left) and after (right) adsorption by the  $\text{Fe}_3\text{O}_4@\text{SiO}_2\text{-NH}_2$  (a) and  $\text{Fe}_3\text{O}_4@\text{SiO}_2$  (b).

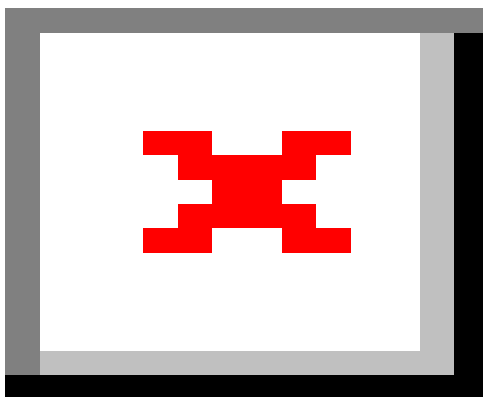

**Figure S6.** The Zeta-potential value of  $\text{Fe}_3\text{O}_4@\text{SiO}_2\text{-NH}_2$  and  $\text{Fe}_3\text{O}_4@\text{SiO}_2$  varying with pH.



**Figure S7.** The effect of CTAB, SDS and Tween-20 on the adsorption ability. The concentration of surfactant were 0.02M.

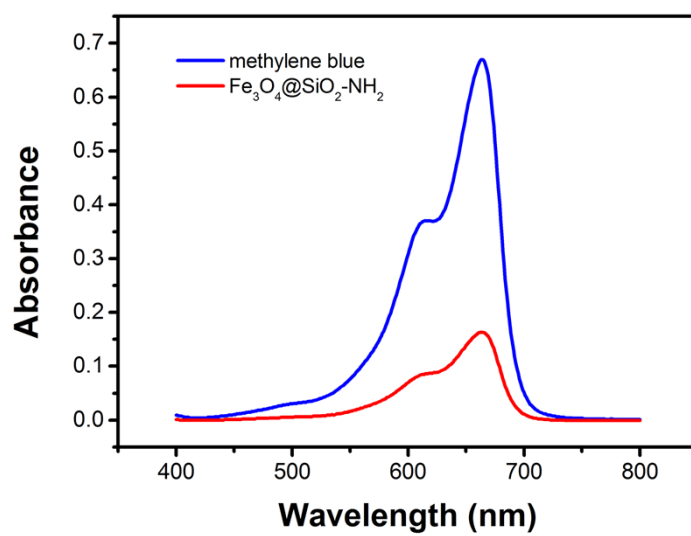

(a)

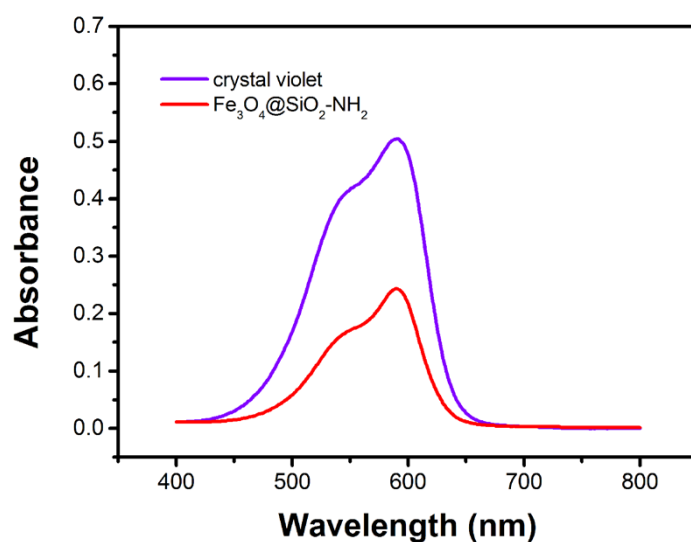

(b)

**Figure S8.** Adsorption by  $\text{Fe}_3\text{O}_4@\text{SiO}_2\text{-NH}_2$  of (a) methylene blue and (b) crystal violet dissolved in Yangtze River water. The concentration of  $\text{Fe}_3\text{O}_4@\text{SiO}_2\text{-NH}_2$  was 100mg/L and the initial concentration of dye solution was 10 mg/L.



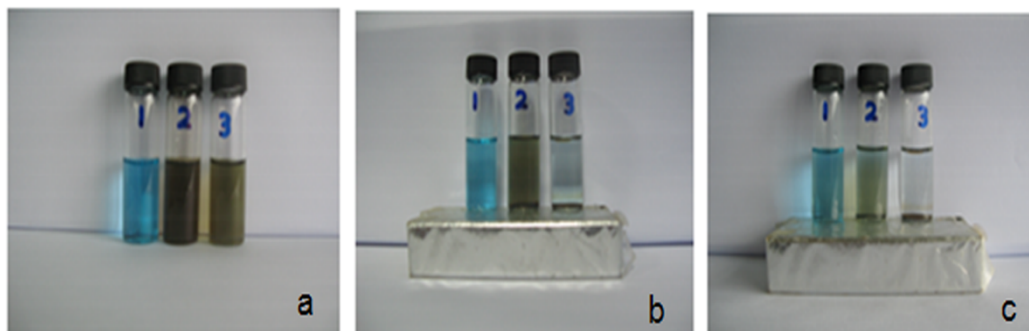

**Figure S9.** Magnetic separation behavior of (a) at 0 hours, (b) after 30mins, (c) after 12 hours. (1) MG, (2)  $\text{Fe}_3\text{O}_4@\text{SiO}_2$ , (3)  $\text{Fe}_3\text{O}_4@\text{SiO}_2\text{-NH}_2$ .

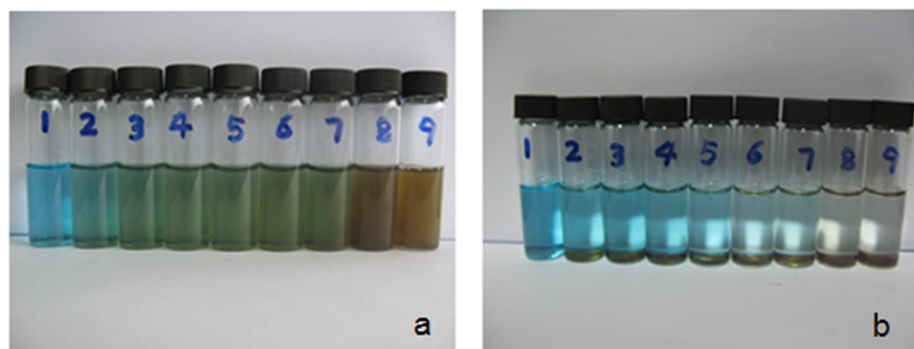

**Figure S10.** Magnetic separation behavior of (a) at 0mins, (b) after 30mins. From 1-9 is the concentration of  $\text{Fe}_3\text{O}_4@\text{SiO}_2\text{-NH}_2$  (0mg/L, 12mg/L, 18mg/L, 25mg/L, 26mg/L, 31mg/L, 45mg/L, 100mg/L, 150mg/L)
